# Supplementary material for: In situ construction strategy for three-dimensional Janus cellulose aerogel with highly efficient oil–water separation performance: from hydrophobicity to asymmetric wettability
Source: Royal Society of Chemistry journal article supplement (doi:10.1039/d2gc02275c), 2022-01-01
Supplement: d2gc02275c1.pdf [file d2gc02275c1.pdf]

# **Supplementary Material**

## **570228 Hainan, China**

### **In-site construction strategy for three-dimensional Janus cellulose aerogel with high efficient oil-water separation performance: from hydrophobicity to asymmetric wettability**

Yongsheng Fei, Yujin Tan, Yuyi Deng, Pengzhe Xia, Jingru Cheng, Congcong Wang,  
Jingjing Zhang, Chenxi Niu, Qian Fu, Lingbin Lu\*

Special Glass Key Lab of Hainan Province, School of Materials Science and Engineering, Hainan  
University, 58 Renmin Road, Haikou 570228, China

\*Correspondence: [lulingbin@126.com](mailto:lulingbin@126.com)

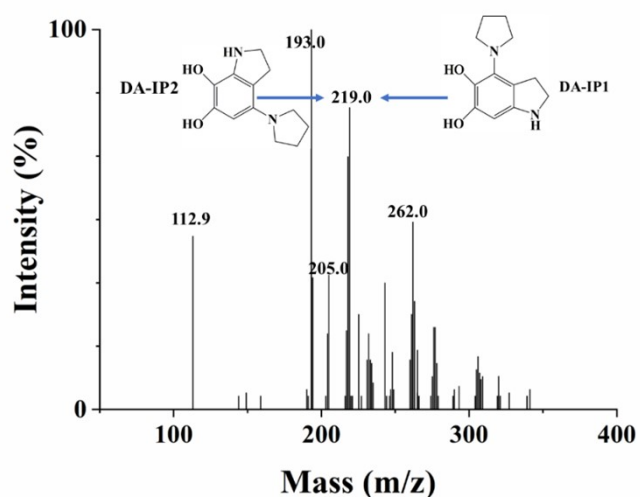

Fig. S1. Mass spectrogram of the dopamine solution after 9 min.

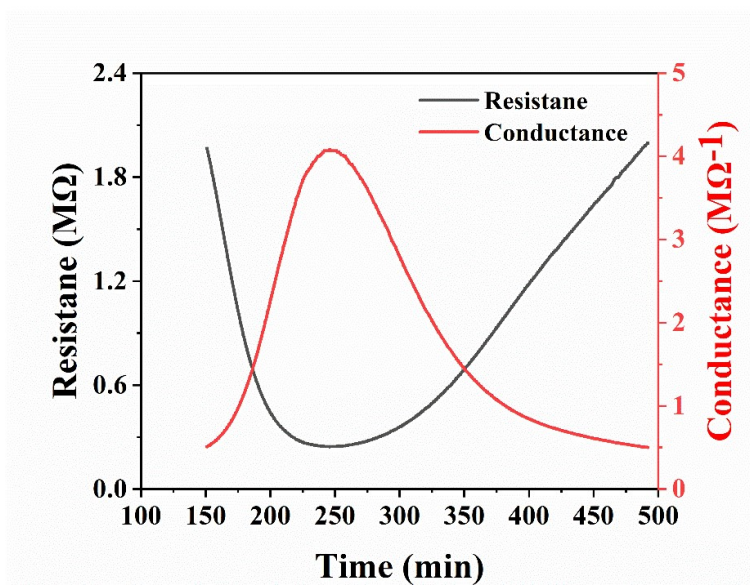

Fig. S2. Conductivity and resistance of dopamine solution with reaction time.

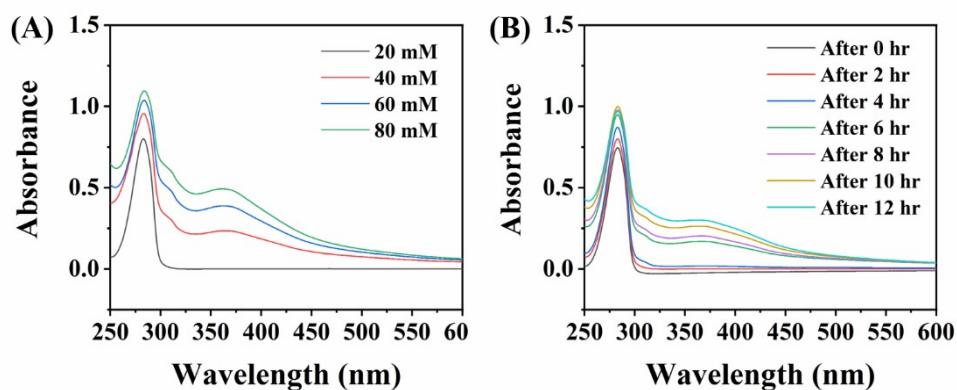

**Fig. S3.** The UV/Vis spectra of methanol solutions with dopamine (10 mM) and pyrrolidine (20mM, 40mM, 60mM, 80mM) (A), The UV/Vis spectra of methanol solutions (pyrrolidine=10mM, dopamine=10mM) with different reaction times(B).

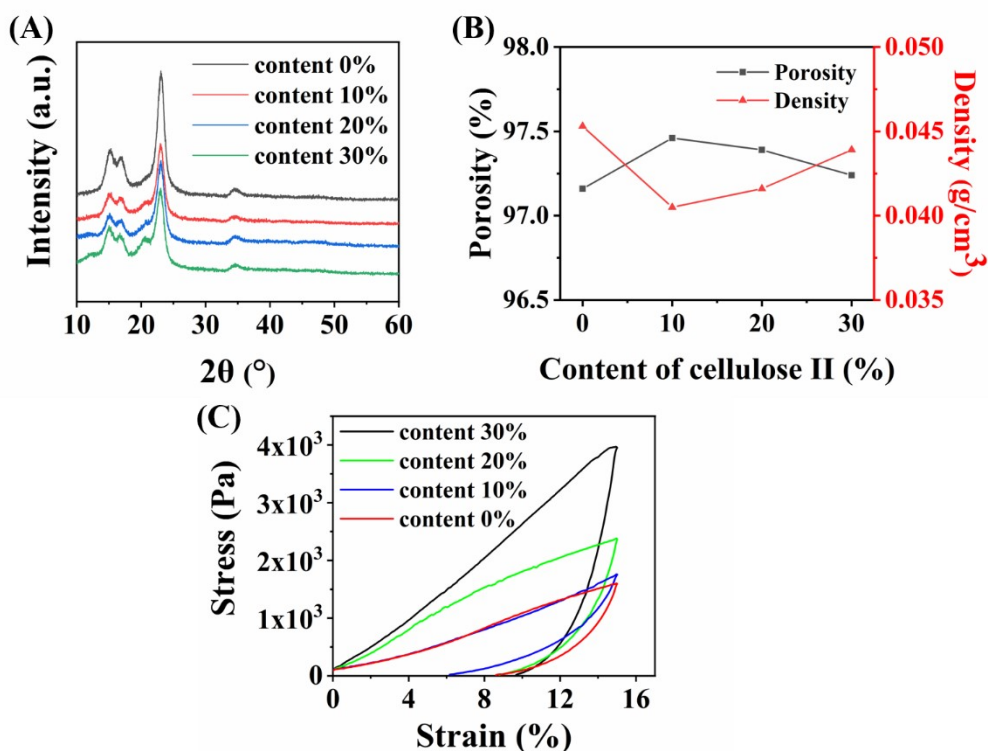

**Fig. S4.** XRD patterns of CA(A), porosity and density of CA(B), stress-strain patterns of CA compression properties (C).

**Tab. S1.** Various solvents' relative polarity to water.

| Dopamine-insoluble | Relative polarity | Dopamine-soluble | Relative polarity |
|--------------------|-------------------|------------------|-------------------|
|--------------------|-------------------|------------------|-------------------|

| solvents        |       | solvents       |       |
|-----------------|-------|----------------|-------|
| Cyclohexane     | 0.006 | DMF            | 0.386 |
| Xylene          | 0.074 | DMSO           | 0.444 |
| Benzene         | 0.111 | Benzyl alcohol | 0.608 |
| Tetrahydrofuran | 0.207 | 1-propanol     | 0.617 |
| Chloroform      | 0.259 | Ethanol        | 0.654 |
| Acetone         | 0.355 | Methanol       | 0.762 |
|                 |       | Water          | 1.000 |

**Tab. S2.** pH values of three organic base solutions.

|    | Pyrrolidine<br>solution | Diethylamine<br>solution | Triethylamine<br>solution |
|----|-------------------------|--------------------------|---------------------------|
| pH | 8.14                    | 7.85                     | 7.39                      |

**Tab. S3.** pH values of pyrrolidine at different concentrations.

|    | 20mM | 40mM | 60mM | 80mM |
|----|------|------|------|------|
| pH | 8.27 | 8.36 | 8.41 | 8.45 |
